# Supplementary material for: Leaching of phosphate ores with lower dissolution of metallic impurities: the dual role of sodium oleate
Source: Royal Society of Chemistry journal article supplement (doi:10.1039/d3ra00897e), 2023-01-01
Supplement: d3ra00897e1.pdf [file d3ra00897e1.pdf]

*Supporting Information*

**Sodium Oleate Assisted High-Efficient Utilization of Phosphate Ores: Improved  
Leaching Performance and Reduced Metallic Impurities**

Yuhe Zhou<sup>a</sup>, Guocan Zheng<sup>a,b</sup>, Shaodou Cen<sup>a</sup>, Renlong Liu<sup>a,c,\*</sup>, Changyuan Tao<sup>a,c</sup>

<sup>a</sup> College of Chemistry and Chemical Engineering, Chongqing University, Chongqing 400044, China

<sup>b</sup> Analytical and Testing Center, Chongqing University, Chongqing 400044, China

<sup>c</sup> State Key Laboratory of Coal Mine Disaster Dynamics and Control, Chongqing University,  
Chongqing 400044, China

\* Corresponding Author: [rlr@cqu.edu.cn](mailto:rlr@cqu.edu.cn) (R. Liu)

## S1. Calculation of Adsorption Energy

The equation for the calculation of adsorption energy is shown below.

$$\Delta E_{ads} = E_{PG-SOL} - E_{PG} - E_{SOL} \quad (S1)$$

where  $\Delta E_{ads}$  is the adsorption energy (eV);  $E_{PG-SOL}$ ,  $E_{PG}$ , and  $E_{SOL}$  are the energy of PG-SOL complex (eV), energy of PG (eV), and energy of SOL (eV), respectively.

## S2. Additional Figures and Tables

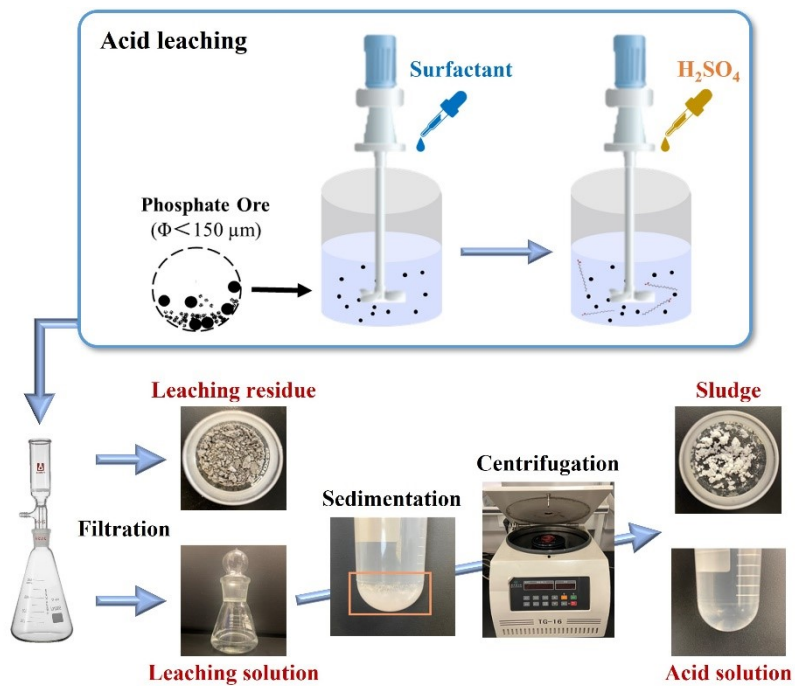

**Figure S1.** Schematic of the acid leaching and the sedimentation of leaching solution.

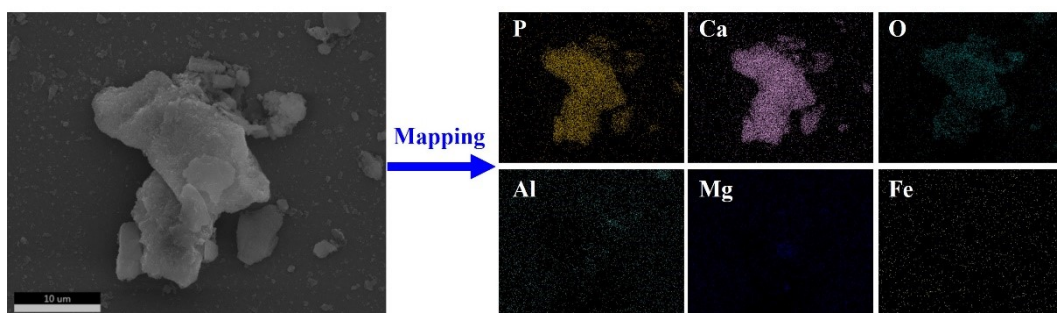

**Figure S2.** SEM-EDS analysis performed on the PO.

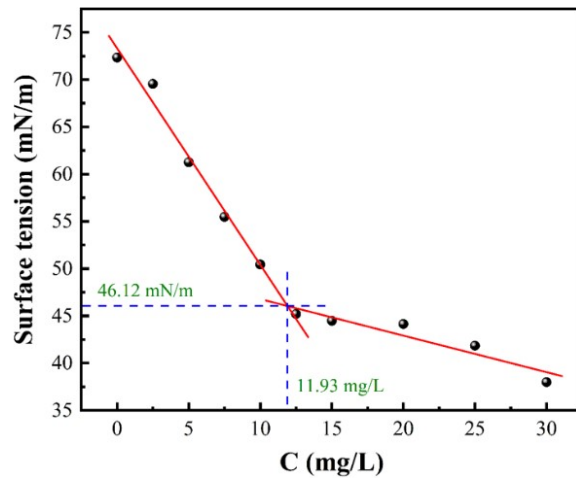

Figure S3. Equilibrium surface tension curves of SOL solutions.

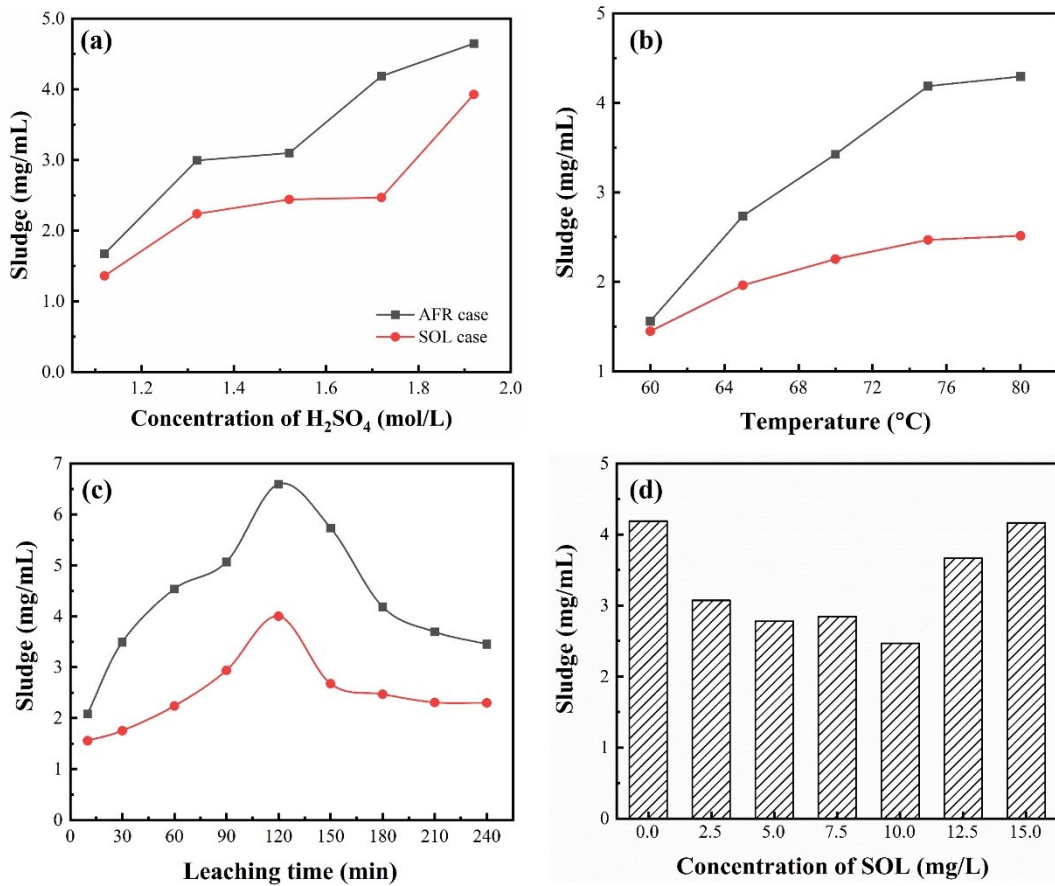

Figure S4. The effect of (a) sulfuric acid concentrations, (b) leaching temperature, (c) leaching time, and (d) surfactant concentration on the amount of sludge.

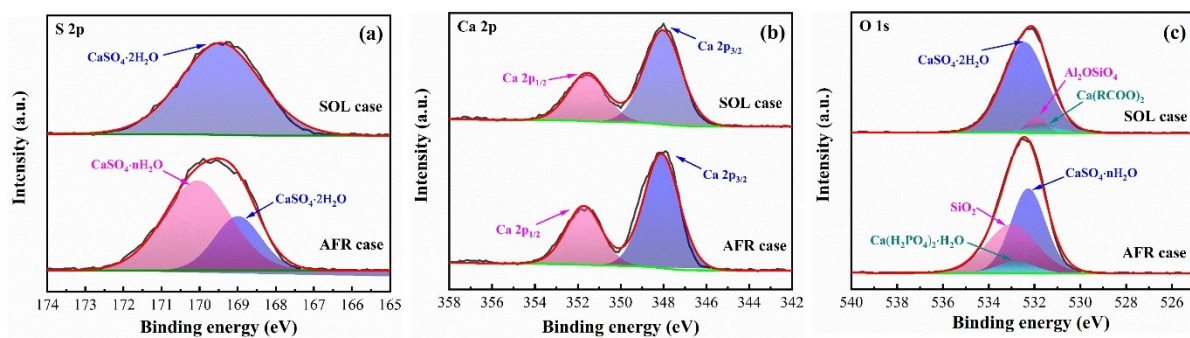

**Figure S5.** XPS spectra for the sludge samples: (a) S 2p, (b) Ca 2p, and (c) O 1s.

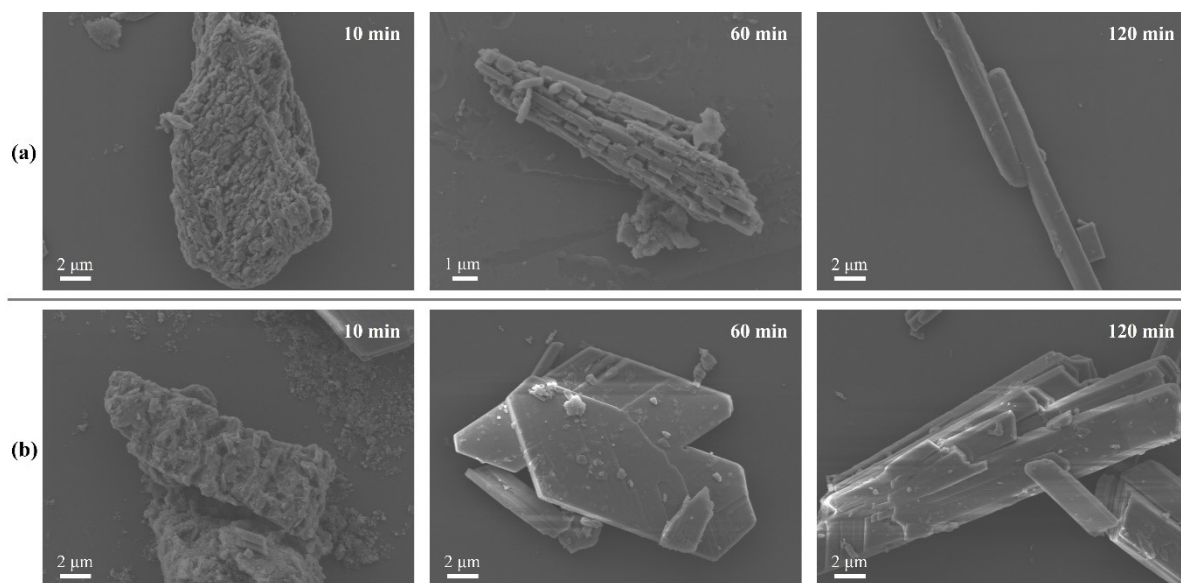

**Figure S6.** SEM analysis of the leaching residue in (a) AFR and (b) SOL cases at different leaching time.

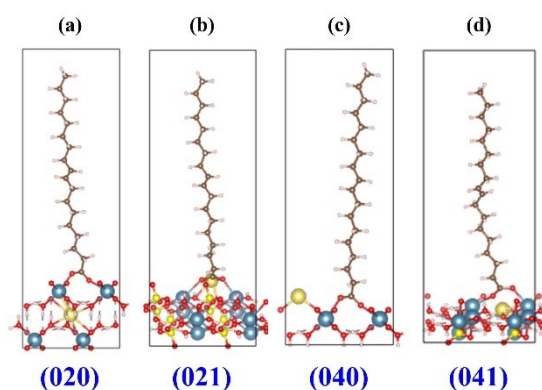

**Figure S7.** Adsorption configurations of SOL on (020), (021), (040), and (041) surfaces of PG.

**Table S1.** Details of the chemical reagents.

| Chemical      | Formula                                            | Molecular weight (g/mol) | Purity  | Supplier |
|---------------|----------------------------------------------------|--------------------------|---------|----------|
| CTAB          | C <sub>19</sub> H <sub>42</sub> BrN                | 364.3                    | 98%     | KESHI    |
| PVP           | (C <sub>6</sub> H <sub>9</sub> NO) <sub>n</sub>    | > 2500                   | ≥ 99%   | KESHI    |
| SOL           | C <sub>18</sub> H <sub>33</sub> NaO <sub>2</sub>   | 304.4                    | ≥ 98.5% | KESHI    |
| LSB           | C <sub>17</sub> H <sub>37</sub> NO <sub>3</sub> S  | 335.5                    | 98%     | Aladdin  |
| SDBS          | C <sub>18</sub> H <sub>29</sub> NaO <sub>3</sub> S | 348.5                    | ≥ 90%   | Guangfu  |
| Sulfuric acid | H <sub>2</sub> SO <sub>4</sub>                     | 98.08                    | ≥ 95.0% | KESHI    |

**Table S2.** Experimental conditions.

| Experimental parameter              | Values                               |
|-------------------------------------|--------------------------------------|
| Surfactant concentration (mg/L)     | 2.5, 5*, 7.5, 10, 12.5, 15           |
| Sulfuric acid concentration (mol/L) | 1.12, 1.32, 1.52, 1.72*, 1.92        |
| Leaching temperature (°C)           | 60, 65, 70*, 75, 80                  |
| Leaching time (min)                 | 30, 60, 90, 120, 150, 180*, 210, 240 |

\* Kept constant when other parameters are varied.

**Table S3.** Analysis of variance for investigated experimental variables.

| Variable          | C <sub>SOL</sub> (mg/L) | C <sub>H<sub>2</sub>SO<sub>4</sub></sub> (mol/L) | T (°C) | t (min) |
|-------------------|-------------------------|--------------------------------------------------|--------|---------|
| p-value Prob > F* | 0.0184                  | 0.0017                                           | 0.0093 | 0.0308  |

\* Value less than 0.05 indicates the variable is significant; values greater than 0.10 indicates the variable is not significant.

**Table S4.** XPS data.

|       | Binding energy<br>(eV) | Formula                                                            |
|-------|------------------------|--------------------------------------------------------------------|
| P 2p  | 133.8                  | Ca <sub>3</sub> (PO <sub>4</sub> ) <sub>2</sub>                    |
|       | 134.1                  | NaH <sub>2</sub> PO <sub>4</sub>                                   |
|       | 135.2                  | H <sub>3</sub> PO <sub>4</sub>                                     |
| S 2p  | 169.0                  | CaSO <sub>4</sub> ·2H <sub>2</sub> O                               |
|       | 169.5                  | CaSO <sub>4</sub> ·2H <sub>2</sub> O                               |
|       | 170.1                  | CaSO <sub>4</sub> ·nH <sub>2</sub> O                               |
| Ca 2p | 348.0                  | Ca 2p <sub>3/2</sub>                                               |
|       | 348.1                  | Ca 2p <sub>3/2</sub>                                               |
|       | 351.6                  | Ca 2p <sub>1/2</sub>                                               |
|       | 351.7                  | Ca 2p <sub>1/2</sub>                                               |
| O 1s  | 531.6                  | Ca(RCOO) <sub>2</sub>                                              |
|       | 531.9                  | Al <sub>2</sub> O <sub>3</sub> ·SiO <sub>2</sub>                   |
|       | 532.3                  | CaSO <sub>4</sub> ·nH <sub>2</sub> O                               |
|       | 532.4                  | CaSO <sub>4</sub> ·2H <sub>2</sub> O                               |
|       | 532.8                  | Ca(H <sub>2</sub> PO <sub>4</sub> ) <sub>2</sub> ·H <sub>2</sub> O |
|       | 533.0                  | SiO <sub>2</sub>                                                   |

**Table S5.** Surface elemental compositions (wt.%) of the sludge.

| Sludge   | C     | Ca    | S     | O     | Si   | P    |
|----------|-------|-------|-------|-------|------|------|
| AFR case | 17.61 | 10.09 | 12.15 | 54.35 | 3.04 | 2.75 |
| SOL case | 24.66 | 9.84  | 11.59 | 49.21 | 4.31 | 0.39 |

**Table S6.** Elemental composition of the leaching residues.

| Composition | SO <sub>3</sub> | CaO   | P <sub>2</sub> O <sub>5</sub> | SiO <sub>2</sub> | Al <sub>2</sub> O <sub>3</sub> | K <sub>2</sub> O | Fe <sub>2</sub> O <sub>3</sub> | MgO  | Others |
|-------------|-----------------|-------|-------------------------------|------------------|--------------------------------|------------------|--------------------------------|------|--------|
| AFR (wt%)   | 50.14           | 37.84 | 4.64                          | 4.58             | 0.96                           | 0.58             | 0.47                           | 0.31 | 0.48   |
| SOL (wt%)   | 45.77           | 44.26 | 1.13                          | 5.62             | 1.02                           | 0.66             | 0.67                           | 0.22 | 0.65   |

**Table S7.** Structural information of the unit cell of the PG crystal.

| Parameter | a         | b         | c         | $\alpha$ | $\gamma$ | $\beta$ | Space group |
|-----------|-----------|-----------|-----------|----------|----------|---------|-------------|
| Value     | 11.3580 Å | 30.4040 Å | 13.0440 Å | 90°      | 118.43°  | 90°     | I2/C        |

**Table S8.** Structural information of the unit cell of the fluorapatite crystal.

| Parameter | a         | b         | c        | $\alpha$ | $\gamma$ | $\beta$ | Space group |
|-----------|-----------|-----------|----------|----------|----------|---------|-------------|
| Value     | 18.7260 Å | 18.7260 Å | 6.8780 Å | 90°      | 90°      | 120°    | P63/M       |
